# Supplementary material
Source: publisher site journal article supplement (https://www.dovepress.com/article/504814)
Supplement: Supplementary file 1 [file get_supplementary_file.php]

**Table S1** Demographics of subjects in the SAD, MAD, and food effect study

| Cohort | | Age(yr), Mean(SD) | Sex, Male, n (%) | Height (cm), Mean (SD) | Weight (kg), Mean (SD) | BMI (kg/m2), Mean (SD) |
| --- | --- | --- | --- | --- | --- | --- |
| SAD |  |  |  |  |  |  |
| 12.5mg | n = 2 | 39.0 (2.83) | 1 (50.0%) | 171.25 (13.08) | 69.2 0(15.42) | 23.40 (1.70) |
| 25mg | n = 6 | 29.5 (2.95) | 5 (83.3%) | 166.33 (7.74) | 65.92 (12.79) | 23.67 (2.98) |
| 50mg | n = 6 | 26.8 (5.08) | 5 (83.3%) | 169.92 (3.84) | 61.70 (3.96) | 21.37 (1.32) |
| 100mg | n = 6 | 31.3 (3.44) | 6 (100%) | 175.75 (4.44) | 71.32 (12.39) | 23.03 (3.28) |
| 150mg | n = 6 | 30.2 (5.04) | 6 (100%) | 173.75 (4.59) | 64.47 (6.32) | 21.38 (1.82) |
| 200mg | n = 6 | 32.7 (2.73) | 5 (83.3%) | 169.08 (11.30) | 65.17 (4.88) | 22.90 (1.91) |
| 250mg | n = 6 | 30.5 (6.16) | 5 (83.3%) | 165.00 (7.81) | 63.75 (7.86) | 23.40 (2.06) |
| 300mg | n = 6 | 29.2 (5.78) | 5 (83.3%) | 168.75 (7.48) | 68.12 (13.48) | 23.68 (2.83) |
| Placebo | n =14 | 31.5 (5.03) | 13 (92.9%) | 169.64 (6.13) | 68.76 (7.80) | 23.89( 2.32) |
| Total | n = 58 | 30.7 (4.91) | 51 (87.9%) | 169.8 1(7.24) | 66.62 (9.07) | 23.07 (2.39) |
| MAD |  |  |  |  |  |  |
| 25mg | n = 9 | 28.6 (3.54) | 8 (88.9%) | 164.39 (8.74) | 61.09 (7.26) | 22.60 (1.99) |
| 50mg | n = 9 | 30.2 (5.85) | 8 (88.9%) | 165.72 (7.80) | 64.04 (6.97) | 23.32 (2.04) |
| 75mg | n = 9 | 31.8 (6.70) | 8 (88.9%) | 166.67 (7.93) | 61.88 (9.21) | 22.22 (2.30) |
| Placebo | n = 9 | 34.1 (4.31) | 8 (88.9%) | 166.33 (6.69) | 66.07 (9.96) | 23.82 (2.70) |
| Total | n = 36 | 31.2 (5.43) | 32 (88.9%) | 165.78 (7.53) | 63.27 (8.31) | 22.99 (2.27) |
| Food effect | |  |  |  |  |  |
| Fasting-fed | n = 7 | 34.9(6.41) | 6(85.7%) | 165.64(4.18) | 68.93 (5.23) | 25.13 (2.13) |
| Fed-fasting | n = 7 | 28.0(5.48) | 7(100%) | 169.57(2.78) | 67.94 (7.99) | 23.60 (2.29) |
| Total | n = 14 | 31.4(6.74) | 13(92.9%) | 167.61(3.97) | 68.44 (6.51) | 24.36 (2.26) |

**Table S2** Correlation and Linear Analysis of BGT-002 Plasma Exposure and Dosage in the MAD study (Dose range: 25mg to 75mg)

| Parameters | β | Lower  90%CI | Upper  90%CI | Lower  Limit | Upper  Limit | Linear judgment |
| --- | --- | --- | --- | --- | --- | --- |
| LnCmax (μg/mL) | 0.97 | 0.86 | 1.08 | 0.37 | 1.63 | Linearity is fully established |
| LnAUC0-τ (h*μg/mL) | 1.07 | 0.97 | 1.17 | 0.37 | 1.63 | Linearity is fully established |
| LnCmax,ss (μg/mL) | 0.99 | 0.87 | 1.11 | 0.37 | 1.63 | Linearity is fully established |
| LnAUC0-τ,ss (h*μg/mL) | 1.02 | 0.90 | 1.14 | 0.37 | 1.63 | Linearity is fully established |

**Table S3**  The whole blood-to-plasma partition ratio of BGT-002 in the 75mg cohort of the MAD study

| Parameters | Whole blood PK parameter | | Plasma PK parameter | | Ratio ( Whole blood / Plasma) | |
| --- | --- | --- | --- | --- | --- | --- |
| Cmax,ss （μg/mL) | AUCtau,ss （h*μg/mL) | Cmax,ss （μg/mL) | AUCtau,ss （h*μg/mL) | B/P  [Cmax] | B/P  [AUCtau] |
| N | 9 | 9 | 9 | 9 | 9 | 9 |
| MEAN | 23.58 | 451.11 | 40.69 | 786.98 | 0.58 | 0.57 |
| SD | 4.44 | 94.31 | 4.51 | 104.72 | 0.070 | 0.062 |
| CV% | 18.83 | 20.91 | 11.09 | 13.31 | 12.05 | 10.87 |

Table S4 Pharmacodynamics results in the MAD study (Percent change from baseline)

| **Items** | **Visit** | **25mg n = 9**  **Mean (SD)** | **50mg n = 9**  **Mean (SD)** | **75mg n = 9**  **Mean (SD)** | **Placebo n = 9**  **Mean (SD)** |
| --- | --- | --- | --- | --- | --- |
| Total Cholesterol（TC） | D7 | -0.30 (11.22) | -4.33 (9.71) | -8.49 (10.40) | 5.60 (11.48) |
| D14 | -2.47 (10.33) | -9.48 (10.00) | -15.80 (8.97) | 5.32 (11.85) |
| D19 | -10.98 (12.09) | -13.80 (12.55) | NA | -5.21 (11.62) |
| D24 | NA | NA | -10.90 (12.35) | 0.55 (5.60) |
| High-Density Lipoprotein Cholesterol（HDL-C） | D7 | -8.41 (9.92) | -7.96 (7.72) | -13.04 (11.42) | -12.08 (6.66) |
| D14 | -2.16 (10.77) | -0.69 (10.31) | -17.34 (10.41) | -6.70 (6.92) |
| D19 | -2.67 (10.44) | -2.68 (13.67) | NA | -2.24 (11.86) |
| D24 | NA | NA | -11.16 (8.59) | -1.54 (4.49) |
| non-High-Density Lipoprotein Cholesterol（non-HDL-C） | D7 | 3.19 (12.61) | -2.99 (11.62) | -5.37 (13.23) | 13.29 (15.36) |
| D14 | -2.93 (11.83) | -13.20 (12.68) | -13.59 (13.22) | 10.52 (14.54) |
| D19 | -14.99 (13.72) | -18.50 (14.77) | NA | -5.84 (12.64) |
| D24 | NA | NA | -10.63 (16.26) | 1.90 (6.99) |
| Low-Density Lipoprotein Cholesterol‌（LDL-C） | D7 | -2.81 (13.51) | -5.70 (10.25) | -15.05 (12.08) | 5.88 (16.43) |
| D14 | -5.88 (11.79) | -12.92 (12.23) | -22.37 (12.51) | 6.30 (15.46) |
| D19 | -3.80 (16.69) | -21.52 (14.01) | NA | -0.75 (14.05) |
| D24 | NA | NA | -9.96 (16.78) | 3.11 (4.06) |
| Apolipoprotein A（Apo A） | D7 | -1.15 (5.97) | -10.89 (7.31) | -2.49 (12.13) | -6.34 (5.45) |
| D14 | 9.96 (9.07) | -6.86 (8.29) | -10.26 (6.58) | -1.46 (10.03) |
| D19 | 4.63 (8.01) | -9.44 (9.72) | NA | -3.55 (9.83) |
| D24 | NA | NA | -11.39 (7.17) | -1.89 (8.06) |
| Apolipoprotein B（Apo B） | D7 | -3.90 (11.16) | -5.57 (10.56) | -1.38 (13.05) | 8.66 (13.04) |
| D14 | -6.08 (9.32) | -12.47 (11.84) | -8.77 (15.82) | 9.76 (12.14) |
| D19 | -15.08 (12.90) | -20.68 (13.48) | NA | -7.09 (11.60) |
| D24 | NA | NA | -10.97 (14.89) | -9.18 (15.22) |
| Lipoprotein(a) [Lp(a)] | D7 | 61.56 (59.74) | 42.11 (41.32) | 165.14 (127.42) | 57.66 (35.99) |
| D14 | 16.23 (37.69) | 29.69 (45.99) | 60.93 (70.46) | 29.89 (47.14) |
| D19 | 2.15 (23.12) | 15.29 (49.76) | NA | 1.22 (38.15) |
| D24 | NA | NA | 23.12 (29.76) | 6.50 (45.61) |
| Triglyceride‌（TG） | D7 | 53.29 (63.26) | 22.47 (48.46) | 46.49 (90.23) | 91.4 (91.42) |
| D14 | 17.65 (59.93) | -0.55 (28.82) | 18.52 (81.08) | 35.75 (59.16) |
| D19 | -7.47 (32.32) | -32.68 (22.22) | NA | -11.26 (34.73) |
| D24 | NA | NA | -6.27 (42.52) | -3.45 (44.99) |
| Hypersensitive C-reactive Protein  （hsCRP） | D7 | 6.07 (68.65) | 45.48 (127.03) | 257.40 (577.13) | 1.72 (37.71) |
| D14 | 95.50 (269.08) | 35.91 (82.28) | 536.24 (665.16) | 257.61 (731.35) |
| D19 | 30.29 (99.03) | 44.58 (125.43) | NA | 68.31 (110.95) |
| D24 | NA | NA | 203.42 (570.01) | 2061.76 (2786.25) |
| β- Hydroxybutyric Acid (β-HB) | D7 | -33.57 (32.67) | -32.29 (27.92) | -1.59 (51.08) | 0.46 (51.81) |
| D14 | -34.70 (36.32) | -45.74 (24.03) | 4.42 (45.06) | -18.78 (37.66) |
| D19 | -20.83 (56.05) | -8.60 (89.99) | NA | -13.59 (23.93) |
| D24 | NA | NA | 167.28 (404.98) | 105.56 (154.86) |

Note: NA, not applicable

**Table S5** Summary of adverse events (AEs) in SAD study

| **Parameters** | **12.5mg**  **n = 2** | **25mg**  **n = 6** | **50mg**  **n = 6** | **100mg**  **n = 6** | **150mg**  **n = 6** | **200mg**  **n = 6** | **250mg**  **n = 6** | **300mg**  **n = 6** | **Active Total**  **n=44** | **Placebo**  **n=14** |
| --- | --- | --- | --- | --- | --- | --- | --- | --- | --- | --- |
| TEAE n(%) | 1(50.0) | 2(33.3) | 2(33.3) | 2(33.3) | 3(50.0) | 2(33.3) | 2(33.3) | 3(50.0) | 17(38.6) | 7(50.0) |
| TRAE n(%) | 0(0) | 2(33.3) | 2(33.3) | 2(33.3) | 3(50.0) | 2(33.3) | 2(33.3) | 3(50.0) | 16(36.4) | 6(42.9) |
| SAE n(%) | 0(0) | 0(0) | 0(0) | 0(0) | 0(0) | 0(0) | 0(0) | 0(0) | 0(0) | 0(0) |
| TEAE leading to withdrawal of study n(%) | 0(0) | 0(0) | 0(0) | 0(0) | 0(0) | 0(0) | 0(0) | 0(0) | 0(0) | 0(0) |
| TRAE leading to withdrawal of study n(%) | 0(0) | 0(0) | 0(0) | 0(0) | 0(0) | 0(0) | 0(0) | 0(0) | 0(0) | 0(0) |
| TEAE of CTCAE≥3 n(%) | 0(0) | 0(0) | 0(0) | 0(0) | 0(0) | 0(0) | 0(0) | 0(0) | 0(0) | 1(7.1) |
| TRAE of CTCAE≥3 n(%) | 0(0) | 0(0) | 0(0) | 0(0) | 0(0) | 0(0) | 0(0) | 0(0) | 0(0) | 0(0) |

**Table S6** Summary of adverse events (AEs) in MAD and food effect study

| **Parameters** | **25mg**  **n = 9** | **50mg**  **n = 9** | **75mg**  **n = 9** | **Active Total**  **n=27** | **Placebo**  **n=9** | **Fasted**  **n =14** | **Fed**  **n =14** |
| --- | --- | --- | --- | --- | --- | --- | --- |
| TEAE n(%) | 2(22.2) | 7(77.8) | 8(88.9) | 17(63.0) | 8(88.9) | 5(35.7) | 3(21.4) |
| TRAE n(%) | 0(0) | 4(44.4) | 2(22.2) | 6(22.2) | 3(33.3) | 3(21.4%) | 1(7.1) |
| SAE n(%) | 0(0) | 0(0) | 0(0) | 0(0) | 0(0) | 0(0) | 0(0) |
| TEAE leading to withdrawal of study n(%) | 0(0) | 0(0) | 0(0) | 0(0) | 0(0) | 0(0) | 0(0) |
| TRAE leading to withdrawal of study n(%) | 0(0) | 0(0) | 0(0) | 0(0) | 0(0) | 0(0) | 0(0) |
| TEAE of CTCAE≥3 n(%) | 0(0) | 0(0) | 0(0) | 0(0) | 0(0) | 0(0) | 1(7.1%) |
| TRAE of CTCAE≥3 n(%) | 0(0) | 0(0) | 0(0) | 0(0) | 0(0) | 0(0) | 0(0) |
